# Supplementary material
Source: MDPI journal article supplement (https://www.mdpi.com/2073-4344/11/7/820)
Supplement: s1 [file s1]

## Supplementary Data Section

# Immobilization of Catalase on Chitosan/ZnO and Chitosan/ZnO/Fe<sub>2</sub>O<sub>3</sub> Nanocomposites: A Comparative Study

Reda M. El-Shishtawy<sup>1\*</sup>, Nahed S. E. Ahmed<sup>2</sup> and Yaaser Q. Almulaiky<sup>3,4</sup>

<sup>1</sup>Chemistry Department, Faculty of Science, King Abdulaziz University, Jeddah, P. O. Box 80200, 21589, Saudi Arabia

<sup>2</sup>Dyeing, Printing and Textile Auxiliaries Department, Textile Research Division, National Research Centre, 12622 Giza, Egypt; nahedsea@hotmail.com

<sup>3</sup>Department of Chemistry, College of Science and Arts at Khulis, University of Jeddah, 21921 Jeddah, Saudi Arabia; yaseralmoliki@hotmail.com

<sup>4</sup>Chemistry Department, Faculty of Applied Science, Taiz University, 3191 Taiz, Yemen

\* Correspondence: relshishtawy@kau.edu.sa

**Table S1.** The effect of ionic strength on the immobilization process

| Concentration<br>ZnO Np | Concentration<br>Fe <sub>2</sub> O <sub>3</sub> Np | Ionic<br>strength | Immobilization<br>yield (%) | Catalase<br>activity<br>u/g<br>support | S.A U/mg<br>protein |
|-------------------------|----------------------------------------------------|-------------------|-----------------------------|----------------------------------------|---------------------|
| 0.4g (20%)              | 0.0                                                | pH 6              | 18                          | 101                                    | 289                 |
|                         |                                                    | pH 7              | 24                          | 137                                    | 352                 |
|                         |                                                    | pH 8              | 37                          | 183.5                                  | 417                 |
|                         | 0.2g (10%)                                         | pH 6              | 71.15                       | 254                                    | 532.8               |
|                         |                                                    | pH 7              | 76.25                       | 314                                    | 614.5               |
|                         |                                                    | pH 8              | 84.32                       | 500                                    | 885                 |

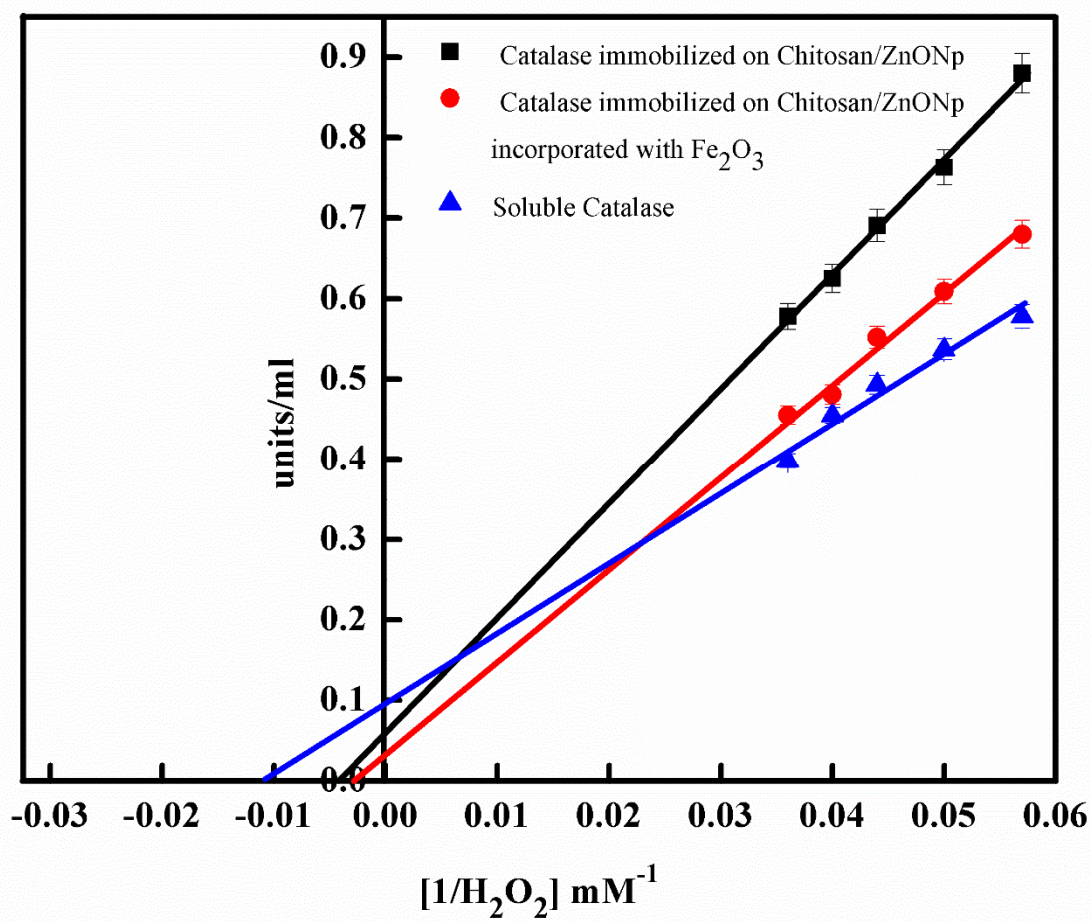

**Figure. S1** Kinetic parameters of immobilized and free catalase. Each point represents the mean of three experiments  $\pm$  SE.

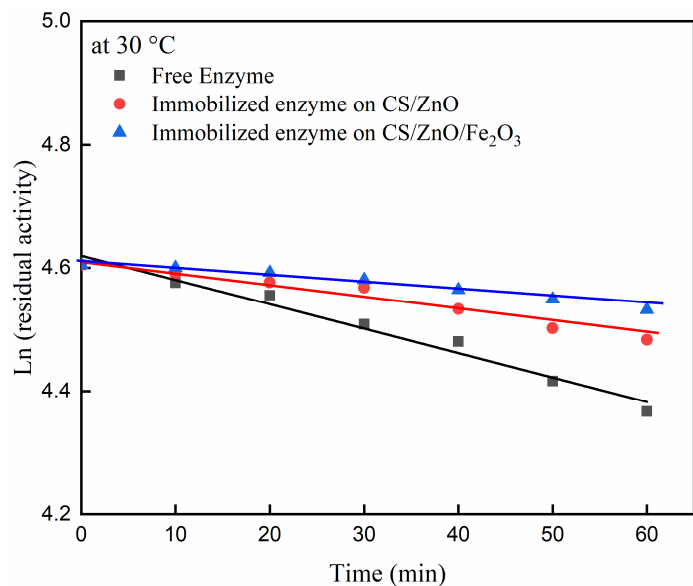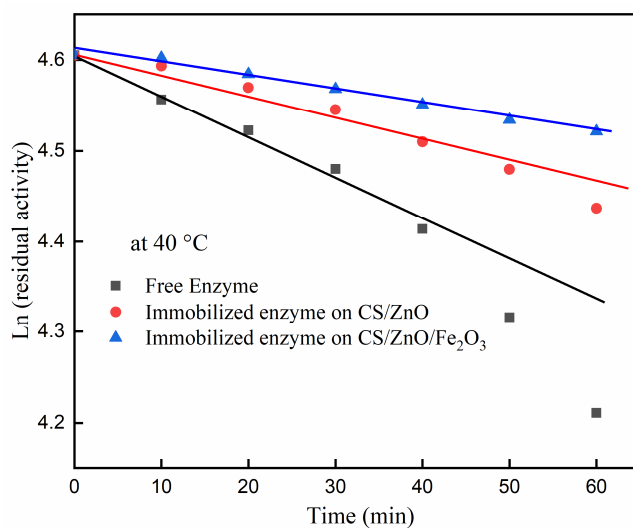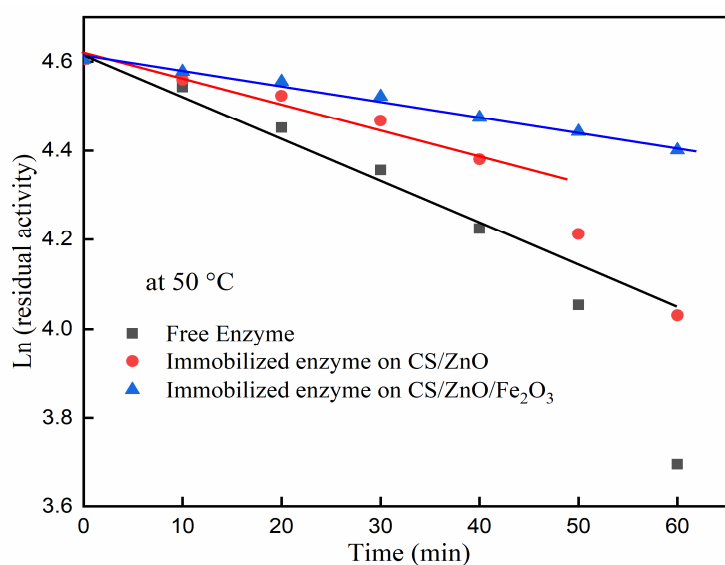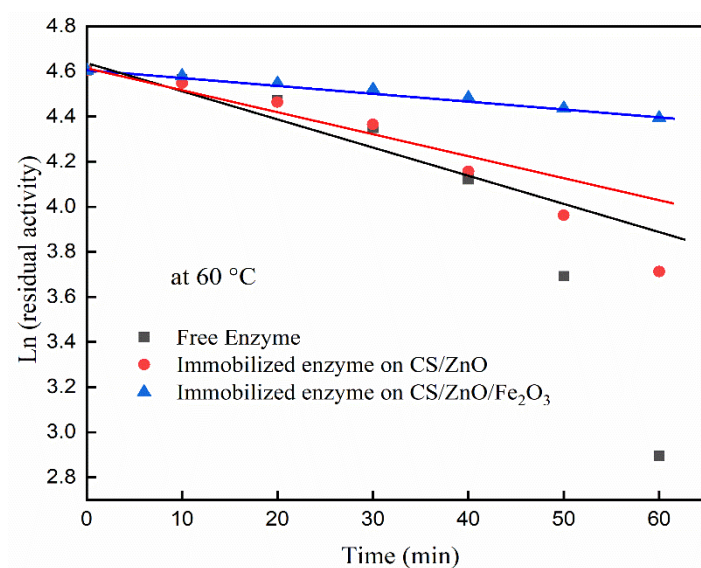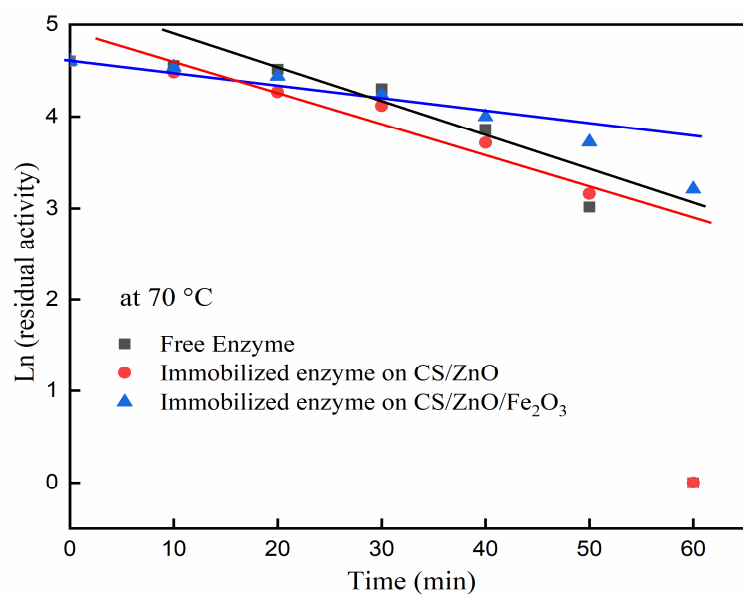

**Figure. S2** Thermal stability and half-life for temperatures of 30 - 70 °C.

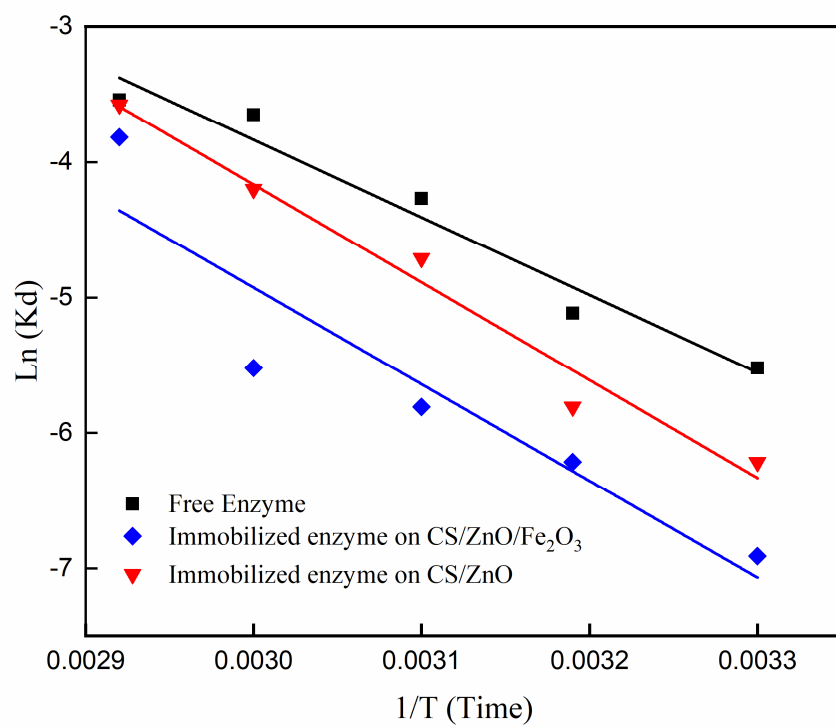

**Figure. S3** Determination of the activation energy based on Arrhenius plots.

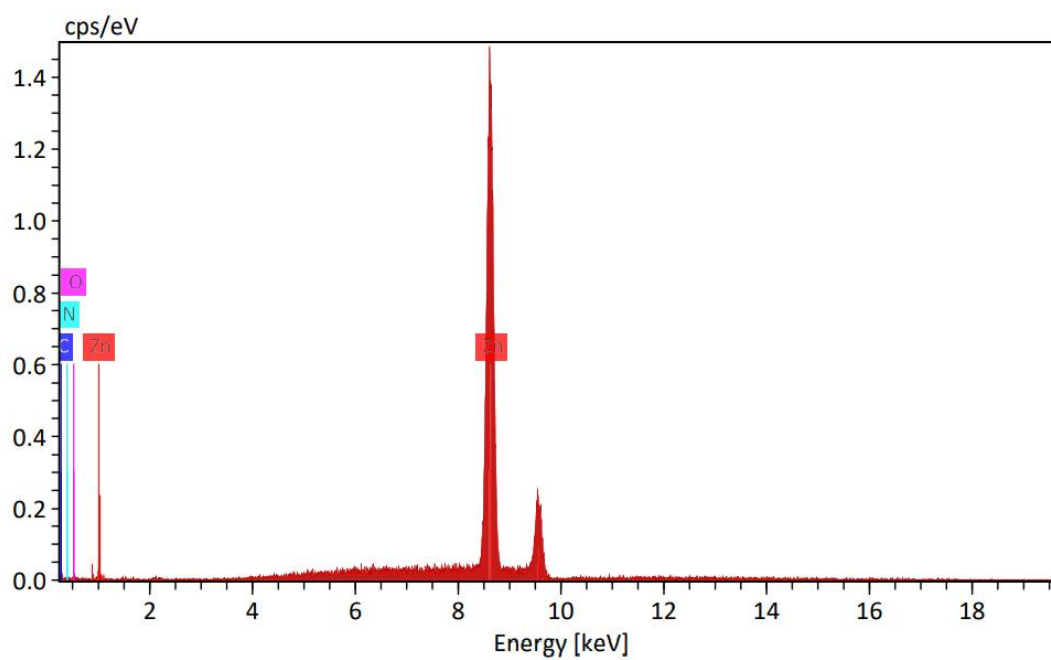

**Figure. S4** EDX Analysis of sample A.

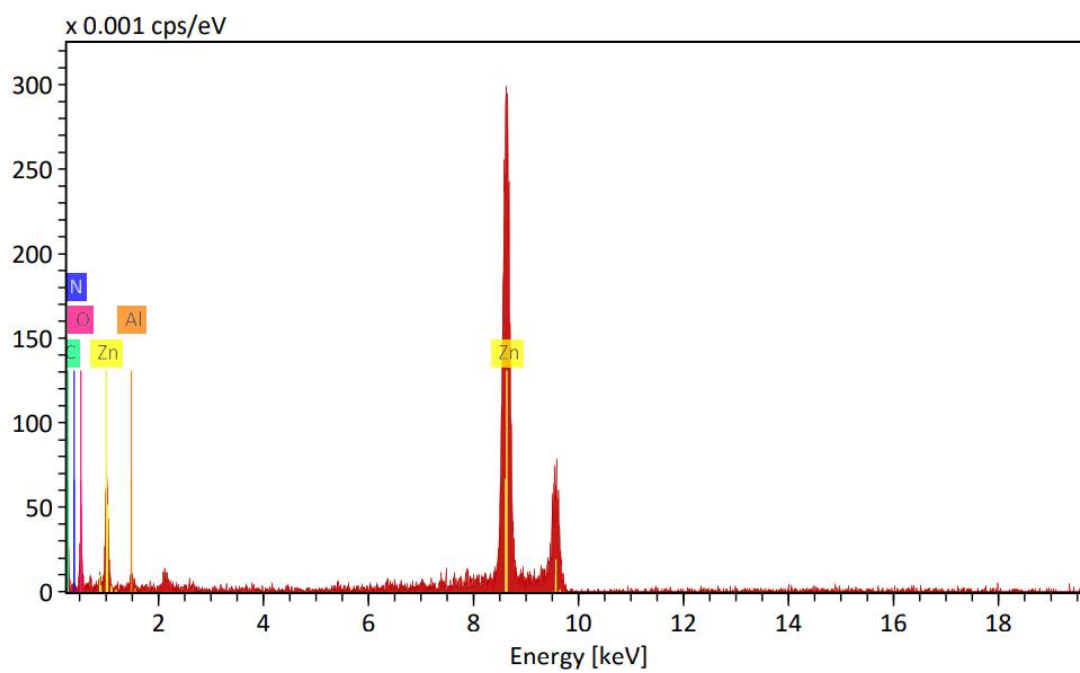

**Figure. S5** EDX Analysis of sample B.

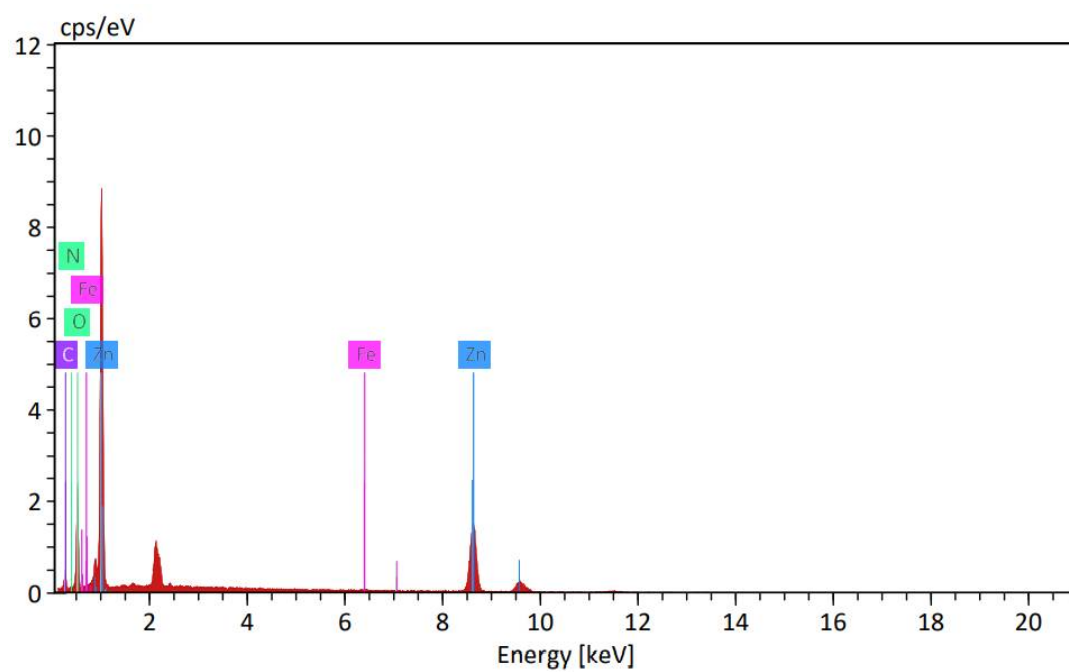

**Figure. S6** EDX Analysis of sample C.

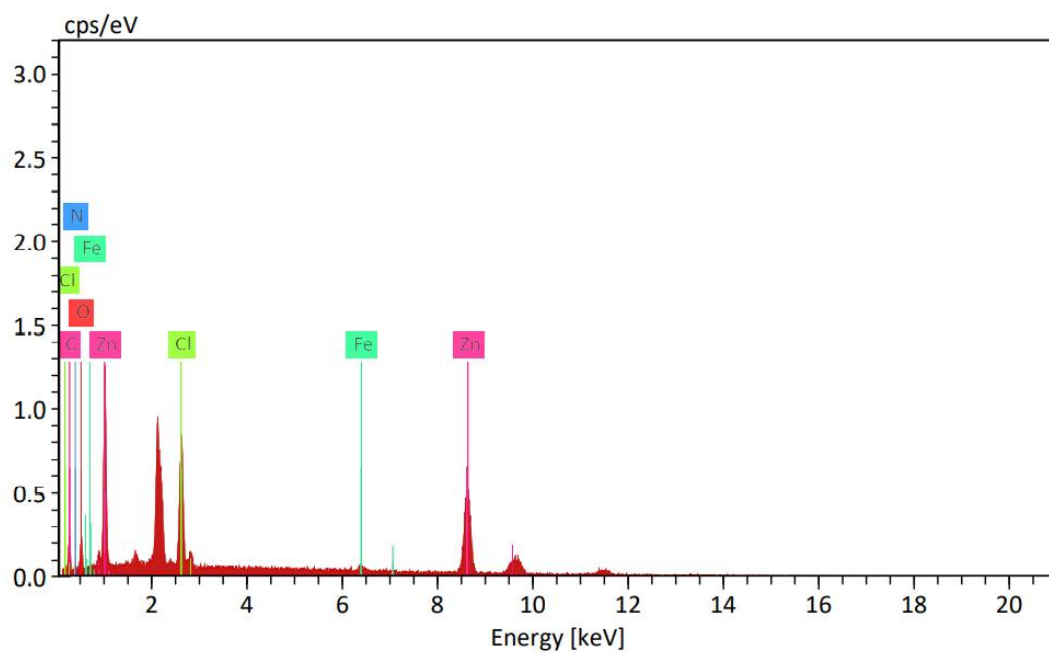

**Figure. S7** EDX Analysis of sample **D**.
